# Supplementary material
Source: ML conference proceedings conference paper supplement (https://aclanthology.org/2020.acl-main.569)
Supplement: Software [file 2020.acl-main.569.Software.zip]

Commentary  
(SN)

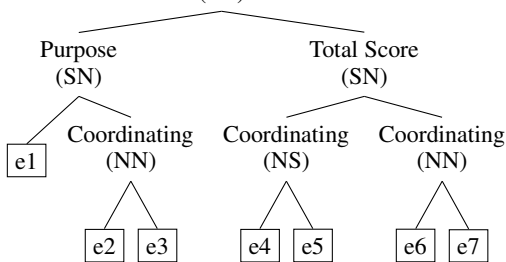

e1: 西藏银行部门积极调整信贷结构， / Bank of Tibetan actively readjusts credit structure

e2: 以确保农牧业生产等重点产业的投入， / Ensuring the investment of key industries such as husbandry production

e3: 加大对工业、能源、交通、通信等建设的正常资金供应量。 / Increase the normal supply of funds for industrial, energy, transportation, communications

e4: 去年新增贷款十四点四一亿元， / Last year, the newly increased loan was 1.441 billion yuan

e5: 比上年增加八亿多元。 / an increase of more than 800 million yuan compared to the previous year.

e6: 农牧业生产贷款（包括扶贫贷款）比上年新增四点三八亿元； / The loans (including aid the poor loan) for agricultural and livestock production newly increased by 438 million yuan compared to the previous year

e7: 乡镇企业贷款增幅为百分之六十一一点八三。 / The increase in loans to township enterprises was 61.83%
