# Supplementary material
Source: ML conference proceedings conference paper supplement (https://aclanthology.org/2020.acl-main.569)

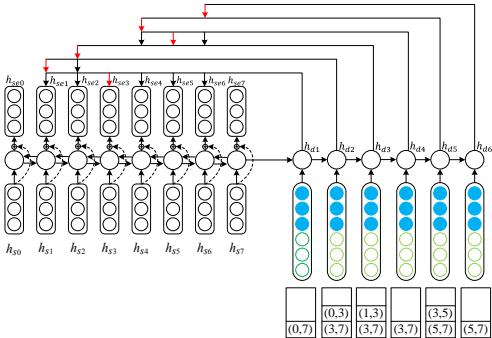

Supplement: Software [file 2020.acl-main.569.Software.zip]

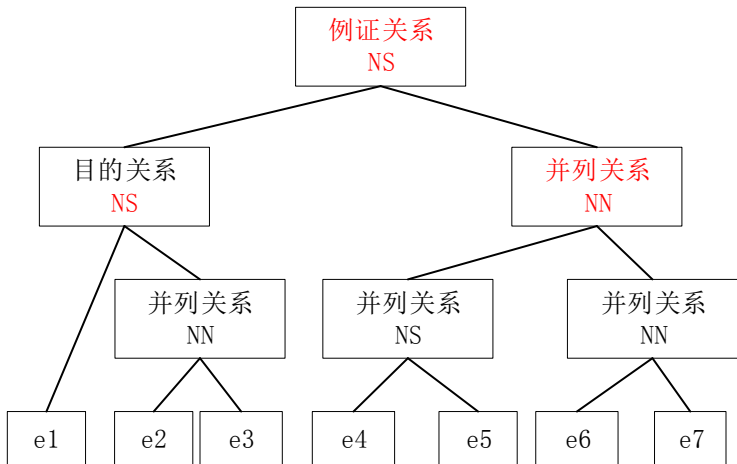

Supplement: Software [file 2020.acl-main.569.Software.zip]

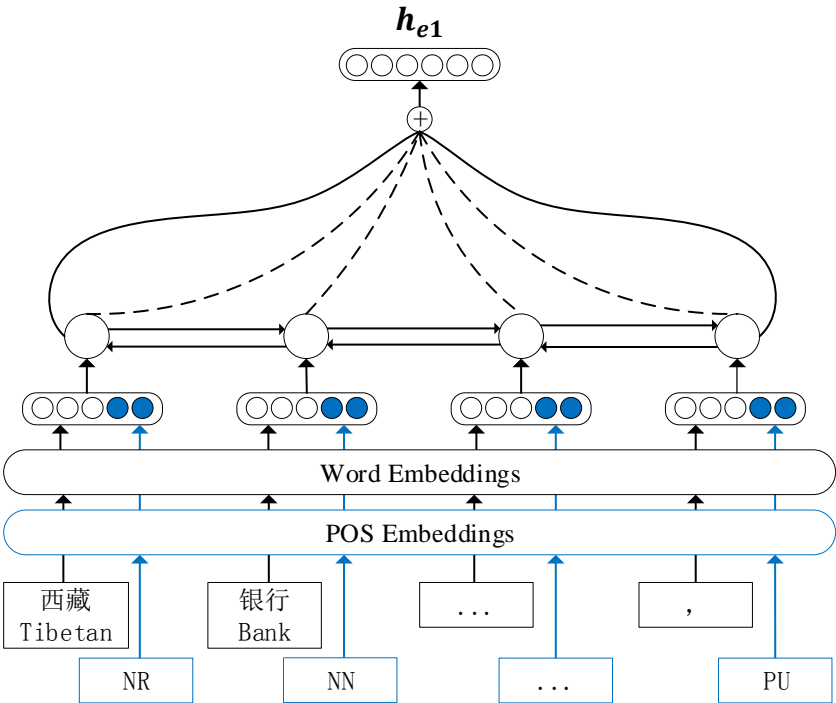

Supplement: Software [file 2020.acl-main.569.Software.zip]

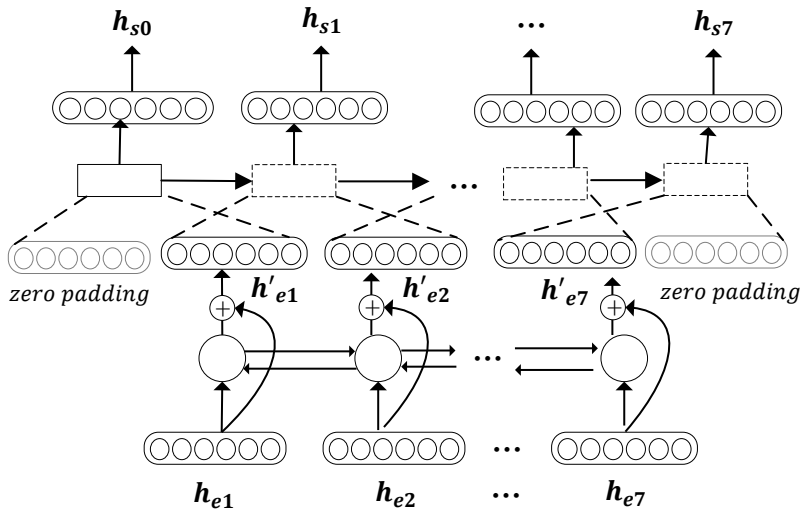

Supplement: Software [file 2020.acl-main.569.Software.zip]

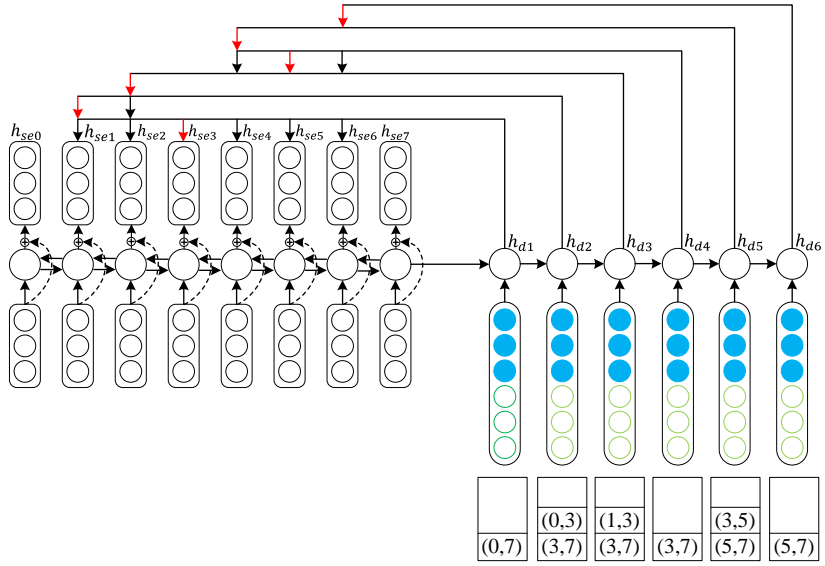

Supplement: Software [file 2020.acl-main.569.Software.zip]

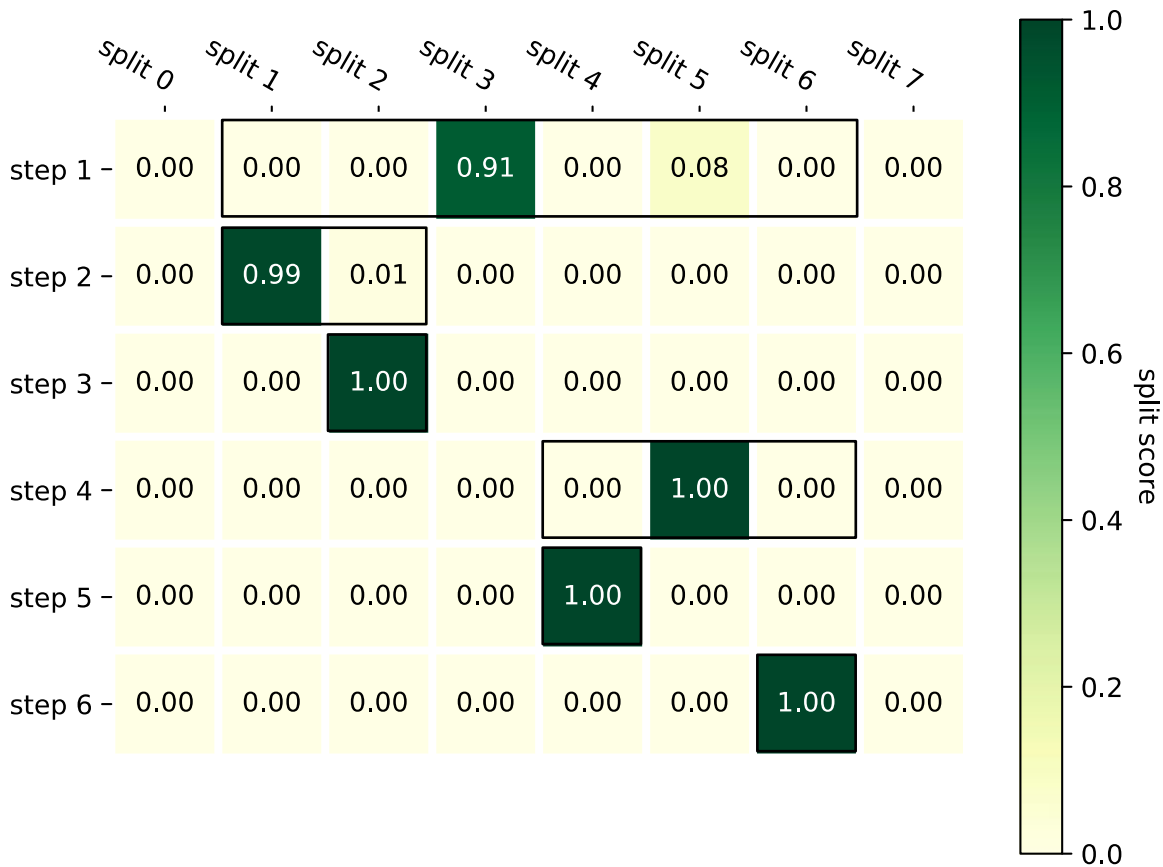

Supplement: Software [file 2020.acl-main.569.Software.zip]
